# Supplementary material
Source: MDPI journal article supplement (https://www.mdpi.com/2312-7481/8/6/64)
Supplement: s1 [file s1 › magnetochemistry-1757087-supplementary.pdf]

---

## Supporting Information

### **Control of Molecular Orientation and Carrier Transport of Thiophene-based Semiconducting Polymer via Superparamagnetic Nanoparticles Fe<sub>3</sub>O<sub>4</sub>@C Assisted Magnetic Alignment method**

Di Hui<sup>1</sup>, Tian Li<sup>2,\*</sup>, Chun Ye<sup>2,\*</sup> and Guoxing Pan<sup>1,\*</sup>

1. Institutes of Physical Science and Information Technology, Anhui University, Hefei 230601, China
2. Anhui Province Key Laboratory of Condensed Matter Physics at Extreme Conditions, High Magnetic Field Laboratory (HMFL), Chinese Academy of Science, Hefei 230031, China,

#### **Corresponding Authors**

\*E-mail: tianli@hmfl.ac.cn (T.L.);

cye927@hmfl.ac.cn (C.Y.);

pangrady@mail.ustc.edu.cn (G.P.)

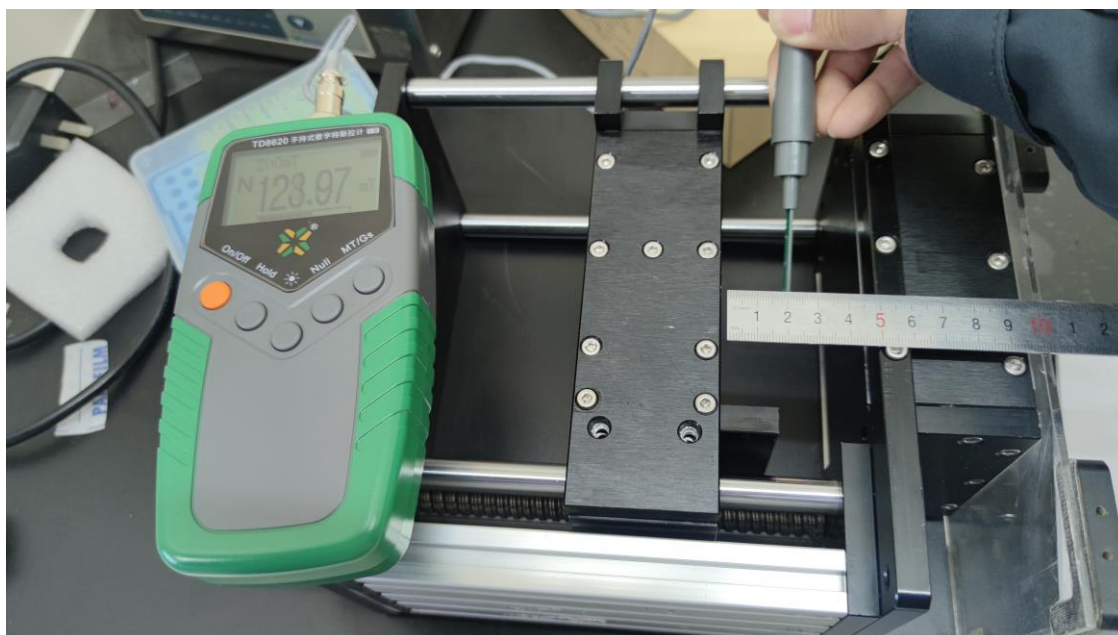

**Figure S1.** The photograph of the magnet (0.12 T)

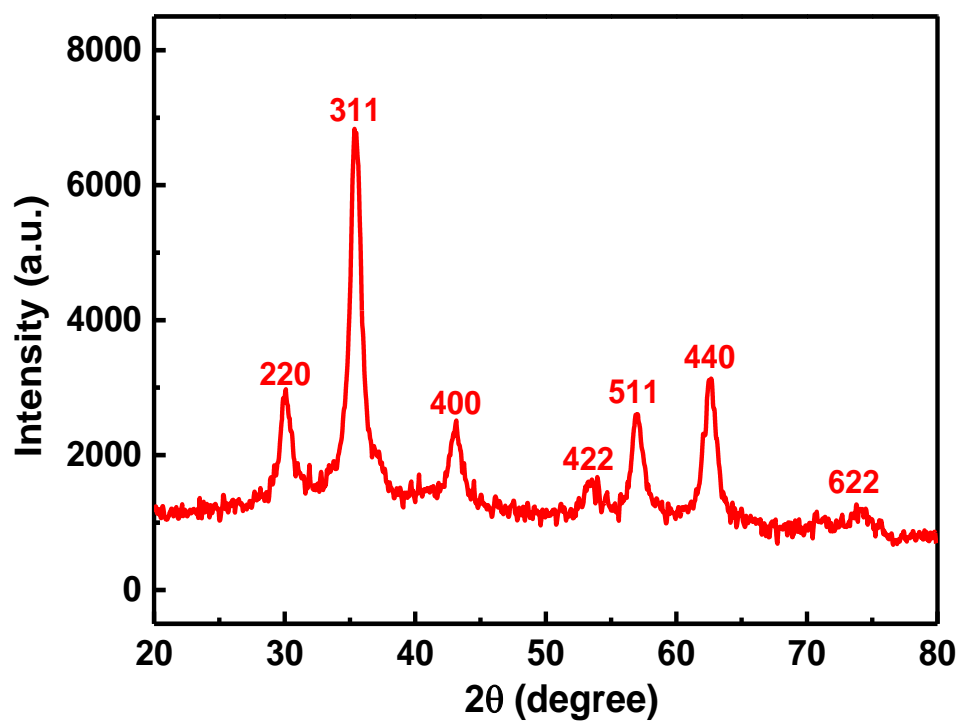

**Figure S2.** The XRD pattern of the Fe<sub>3</sub>O<sub>4</sub>@C nanoparticles.

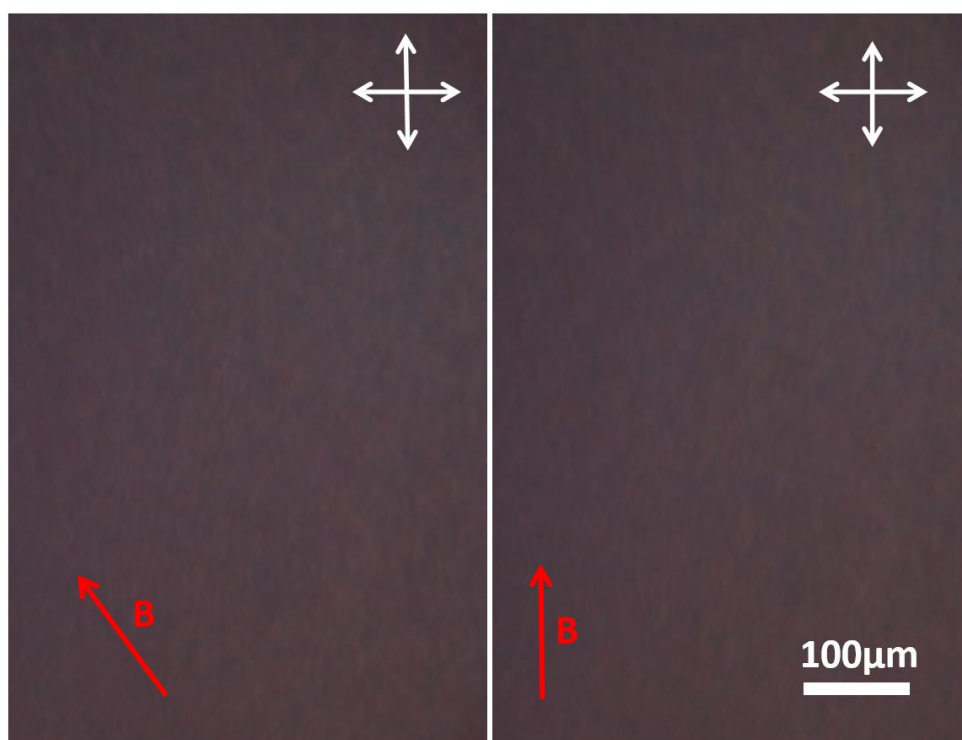

**Figure S3.** The POM images of the magnetically aligned pure PBTTT film. The red arrows denote the magnetic field direction;

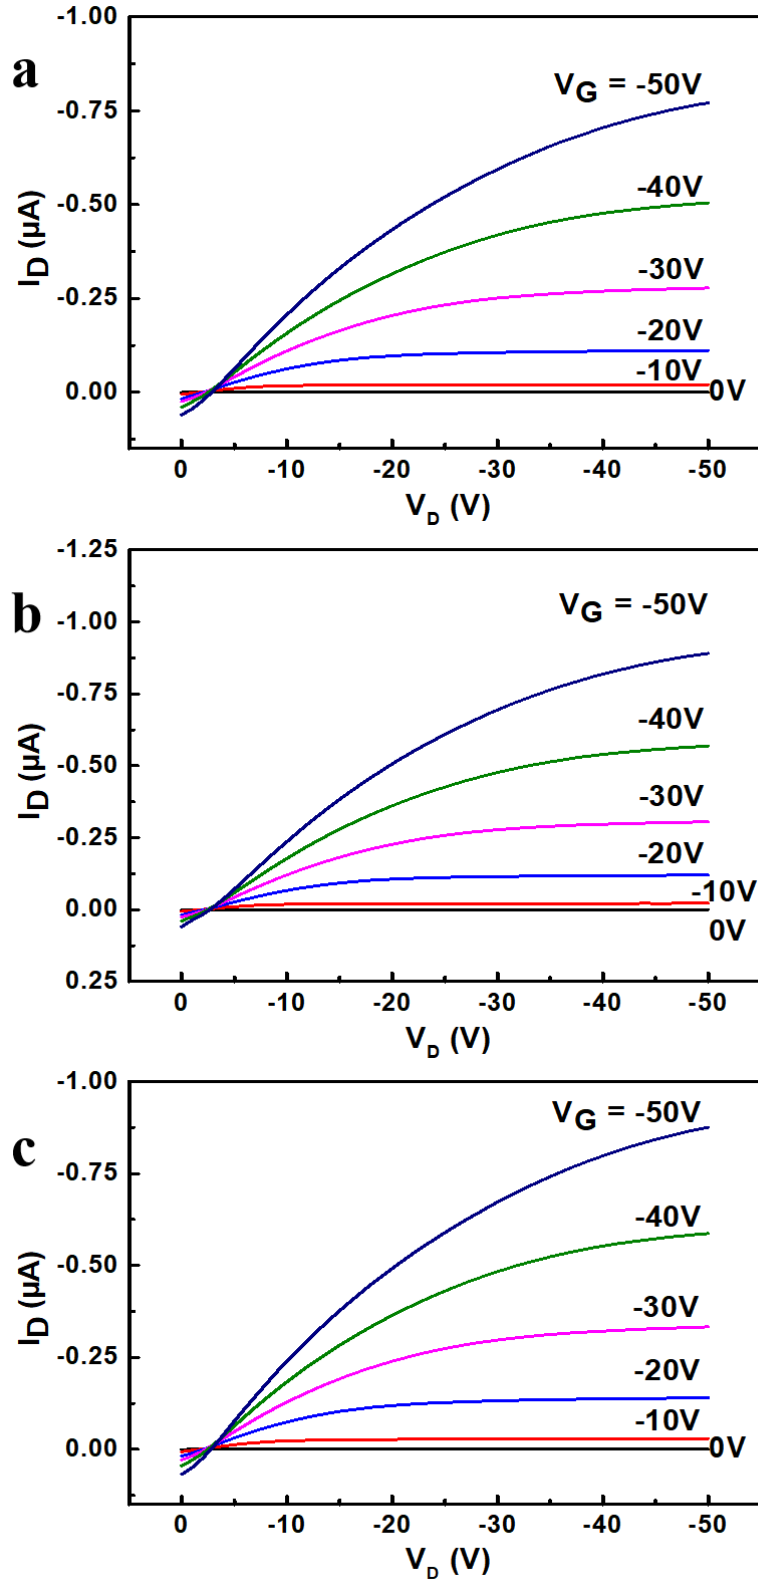

**Figure S4.** Output curves of the OFET devices of the magnetically aligned  $\text{Fe}_3\text{O}_4@\text{C}/\text{PBTTT}$  composite film with channel current perpendicular to magnetic field direction (a), unaligned spin-coated pure PBTTT film (b) and spin-coated  $\text{Fe}_3\text{O}_4@\text{C}/\text{PBTTT}$  composite film (c), respectively.
